# Supplementary material for: Multiscale Modeling of Inflammation-Induced Tumorigenesis Reveals Competing Oncogenic and Oncoprotective Roles for Inflammation
Source: Oxford University Press journal article supplement (doi:10.1158/0008-5472.can-17-1662), 2017-09-26
Supplement: 00085472can171662-sup-184350_2_supp_4259278_5w0mrz.xlsx [file 00085472can171662-sup-184350_2_supp_4259278_5w0mrz.xlsx]

## Sheet: Stomach-S
Table S11	Mutation rate of the 6 biological processes
There are three sheets of single mutation, including Colon-S, Liver-S, and Stomach-S, and three sheets of double mutation, including Colon-D, Liver-D, and Stomach-D. Function ID represents the ID of biological processes, Function name gives the name of biological processes, MutationRate gives the GO term mutation rate, MutationNum gives the number of samples containing gene mutations in the GO te…
Function ID	Function name	MutationRate	MutationNum	SampleNum
CPR	cell proliferation	0.768166	222	289
CAR	cell apoptosis	0.737024	213	289
MIB	metabolism	0.615917	178	289
CDR	cell differentiation	0.525952	152	289
DDI	DNA damage	0.474048	137	289
DDR	DNA repair	0.0865052	25	289

## Sheet: Stomach-D
Function ID1	Function ID2	MutationRate	MutationNum	Function name1	Function name2	SampleNum
CAR	CPR	0.705882	204	cell apoptosis	cell proliferation	289
CPR	MIB	0.605536	175	cell proliferation	metabolism	289
CAR	MIB	0.602076	174	cell apoptosis	metabolism	289
CAR	DDI	0.474048	137	cell apoptosis	DNA damage	289
CPR	DDI	0.474048	137	cell proliferation	DNA damage	289
DDI	MIB	0.474048	137	DNA damage	metabolism	289
CDR	CPR	0.467128	135	cell differentiation	cell proliferation	289
CAR	CDR	0.463668	134	cell apoptosis	cell differentiation	289
CDR	MIB	0.380623	110	cell differentiation	metabolism	289
CDR	DDI	0.245675	71	cell differentiation	DNA damage	289
CAR	DDR	0.0865052	25	cell apoptosis	DNA repair	289
CPR	DDR	0.0865052	25	cell proliferation	DNA repair	289
DDR	MIB	0.083045	24	DNA repair	metabolism	289
CDR	DDR	0.083045	24	cell differentiation	DNA repair	289
DDI	DDR	0.0449827	13	DNA damage	DNA repair	289

## Sheet: Liver-S
Function ID	Function name	MutationRate	MutationNum	SampleNum
CAR	cell apoptosis	0.574257	116	202
CPR	cell proliferation	0.534653	108	202
DDI	DNA damage	0.376238	76	202
MIB	metabolism	0.376238	76	202
CDR	cell differentiation	0.287129	58	202
DDR	DNA repair	0.0544554	11	202

## Sheet: Liver-D
Function ID1	Function ID2	MutationRate	MutationNum	Function name1	Function name2	SampleNum
CAR	CPR	0.470297	95	cell apoptosis	cell proliferation	202
CPR	MIB	0.376238	76	cell proliferation	metabolism	202
CAR	MIB	0.371287	75	cell apoptosis	metabolism	202
CPR	DDI	0.361386	73	cell proliferation	DNA damage	202
CAR	DDI	0.361386	73	cell apoptosis	DNA damage	202
DDI	MIB	0.331683	67	DNA damage	metabolism	202
CDR	CPR	0.207921	42	cell differentiation	cell proliferation	202
CAR	CDR	0.19802	40	cell apoptosis	cell differentiation	202
CDR	MIB	0.158416	32	cell differentiation	metabolism	202
CDR	DDI	0.143564	29	cell differentiation	DNA damage	202
CPR	DDR	0.0544554	11	cell proliferation	DNA repair	202
CDR	DDR	0.0544554	11	cell differentiation	DNA repair	202
CAR	DDR	0.0544554	11	cell apoptosis	DNA repair	202
DDR	MIB	0.039604	8	DNA repair	metabolism	202
DDI	DDR	0.0346535	7	DNA damage	DNA repair	202

## Sheet: Colon-S
Function ID	Function name	MutationRate	MutationNum	SampleNum
CAR	cell apoptosis	0.950893	213	224
CPR	cell proliferation	0.9375	210	224
MIB	metabolism	0.660714	148	224
DDI	DNA damage	0.580357	130	224
CDR	cell differentiation	0.366071	82	224
DDR	DNA repair	0.0535714	12	224

## Sheet: Colon-D
Function ID1	Function ID2	MutationRate	MutationNum	Function name1	Function name2	SampleNum
CAR	CPR	0.928571	208	cell apoptosis	cell proliferation	224
CAR	MIB	0.65625	147	cell apoptosis	metabolism	224
CPR	MIB	0.65625	147	cell proliferation	metabolism	224
CAR	DDI	0.580357	130	cell apoptosis	DNA damage	224
CPR	DDI	0.571429	128	cell proliferation	DNA damage	224
DDI	MIB	0.5625	126	DNA damage	metabolism	224
CAR	CDR	0.348214	78	cell apoptosis	cell differentiation	224
CDR	CPR	0.34375	77	cell differentiation	cell proliferation	224
CDR	MIB	0.290179	65	cell differentiation	metabolism	224
CDR	DDI	0.205357	46	cell differentiation	DNA damage	224
CPR	DDR	0.0491071	11	cell proliferation	DNA repair	224
CAR	DDR	0.0446429	10	cell apoptosis	DNA repair	224
CDR	DDR	0.0446429	10	cell differentiation	DNA repair	224
DDR	MIB	0.0401786	9	DNA repair	metabolism	224
DDI	DDR	0.03125	7	DNA damage	DNA repair	224
