# Supplementary material for: Multiscale Modeling of Inflammation-Induced Tumorigenesis Reveals Competing Oncogenic and Oncoprotective Roles for Inflammation
Source: Oxford University Press journal article supplement (doi:10.1158/0008-5472.can-17-1662), 2017-09-26
Supplement: 00085472can171662-sup-184350_2_supp_4259344_2w0rg9.xlsx [file 00085472can171662-sup-184350_2_supp_4259344_2w0rg9.xlsx]

## Sheet: AbNormalRate
Table S12	Cancer risks from 1 to 30 years obtained from simulation under different protocols of periodic acute inammation. The periodic acute inammation score includes 0-15 and 5-15 (Fig. S18 and S19).
IS	IS=10	IS=15	IS=0_15	IS=0_15	IS=0_15	IS=0_15	IS=0_15	IS=0_15	IS=0_15	IS=0_15	IS=0_15	IS=0_15	IS=5_15	IS=5_15	IS=5_15	IS=5_15	IS=5_15	IS=5_15
Periodic	Sustained	Sustained	1week	2weeks	1month	2months	3months	6months	9months	12months	18months	24months	1week	2weeks	1month	2months	3months	6months
Years:1	0	0	0	0	0	0	0	0	0	0	0	0	0	0	0	0	0	0
2	0	0	0	0	0	0	0	0	0	0	0	0	0	0	0	0	0	0
3	0	0	0	0	0	0	0	0	0	0	0	0	0	0	0	0	0	0
4	0	0	0	0	0	0	0	0	0	0	0	0	0	0	0	0	0	0
5	0	0	0.00297619	0.00297619	0.00297619	0	0	0	0	0	0	0	0.00333333	0	0	0	0	0
6	0	0	0.00297619	0.00595238	0.00595238	0	0	0	0.00217391	0	0	0	0.00333333	0	0.00333333	0	0	0
7	0	0.00106157	0.00892857	0.0178571	0.00892857	0	0	0	0.00217391	0	0	0	0.00333333	0	0.00333333	0	0	0
8	0.00138504	0.00212314	0.0208333	0.0327381	0.0119048	0	0.00595238	0	0.00217391	0	0	0	0.00666667	0.00333333	0.00333333	0	0	0
9	0.00415512	0.00849257	0.0267857	0.0357143	0.0178571	0.00892857	0.00595238	0	0.00217391	0	0	0	0.01	0.00333333	0.00333333	0	0	0
10	0.00692521	0.0169851	0.0297619	0.0505952	0.0267857	0.00892857	0.0119048	0	0.00217391	0	0	0	0.01	0.00333333	0.00666667	0	0	0
11	0.00969529	0.037155	0.0416667	0.0595238	0.0446429	0.014881	0.0178571	0	0.00217391	0	0	0	0.01	0.00333333	0.00666667	0	0	0
12	0.0152355	0.0509554	0.0505952	0.0952381	0.0654762	0.0208333	0.0178571	0	0.00217391	0	0	0	0.01	0.00333333	0.00666667	0	0	0
13	0.0207756	0.0647558	0.0654762	0.113095	0.077381	0.0327381	0.0297619	0	0.00217391	0.00217391	0	0	0.0166667	0.00333333	0.00666667	0	0.00333333	0
14	0.0235457	0.081741	0.0863095	0.130952	0.107143	0.0416667	0.0327381	0	0.00434783	0.00217391	0	0	0.02	0.00666667	0.00666667	0	0.00333333	0
15	0.033241	0.0976645	0.110119	0.154762	0.125	0.047619	0.0357143	0.00297619	0.00434783	0.00217391	0.00217391	0	0.0233333	0.00666667	0.00666667	0	0.00333333	0
16	0.0470914	0.129512	0.122024	0.178571	0.14881	0.0654762	0.047619	0.00595238	0.00652174	0.00217391	0.00217391	0	0.0366667	0.01	0.00666667	0	0.00333333	0
17	0.0567867	0.146497	0.14881	0.1875	0.166667	0.0892857	0.0565476	0.00892857	0.00652174	0.00217391	0.00217391	0	0.04	0.0133333	0.01	0	0.00333333	0
18	0.067867	0.161359	0.160714	0.190476	0.178571	0.119048	0.0803571	0.0119048	0.00869565	0.00217391	0.00217391	0	0.04	0.0133333	0.0133333	0	0.00333333	0
19	0.0858726	0.186837	0.169643	0.21131	0.196429	0.139881	0.0922619	0.0119048	0.00869565	0.00434783	0.00217391	0	0.0433333	0.0133333	0.0133333	0	0.00333333	0
20	0.0955679	0.203822	0.199405	0.238095	0.217262	0.157738	0.116071	0.0238095	0.00869565	0.00652174	0.00217391	0	0.0466667	0.02	0.0133333	0	0.00333333	0
21	0.109418	0.234607	0.21131	0.25	0.229167	0.175595	0.127976	0.0297619	0.0108696	0.00869565	0.00434783	0	0.0566667	0.02	0.0133333	0	0.00333333	0
22	0.119114	0.252654	0.235119	0.258929	0.238095	0.1875	0.139881	0.0327381	0.0152174	0.0108696	0.00652174	0	0.0633333	0.02	0.02	0	0.00333333	0
23	0.135734	0.281316	0.252976	0.270833	0.252976	0.199405	0.157738	0.0416667	0.0173913	0.0108696	0.00652174	0	0.0766667	0.0233333	0.02	0	0.00333333	0
24	0.15097	0.308917	0.285714	0.276786	0.267857	0.21131	0.175595	0.0535714	0.026087	0.0108696	0.00652174	0	0.0766667	0.03	0.0233333	0	0.00333333	0
25	0.16205	0.330149	0.306548	0.285714	0.270833	0.220238	0.190476	0.0565476	0.0304348	0.0152174	0.00652174	0.00217391	0.08	0.0333333	0.0266667	0	0.00333333	0
26	0.171745	0.35138	0.321429	0.28869	0.270833	0.232143	0.205357	0.0684524	0.0326087	0.0195652	0.00652174	0.00217391	0.0833333	0.0366667	0.03	0	0.00333333	0
27	0.184211	0.382166	0.342262	0.291667	0.285714	0.244048	0.223214	0.0803571	0.0326087	0.0217391	0.00869565	0.00217391	0.09	0.04	0.03	0.00333333	0.00333333	0
28	0.195291	0.403397	0.348214	0.294643	0.28869	0.252976	0.229167	0.0863095	0.0391304	0.0217391	0.0108696	0.00217391	0.103333	0.0433333	0.0333333	0.00333333	0.00333333	0
29	0.217452	0.428875	0.360119	0.306548	0.291667	0.267857	0.25	0.0922619	0.0434783	0.023913	0.0108696	0.00217391	0.106667	0.05	0.0333333	0.00333333	0.00333333	0
30	0.232687	0.450106	0.372024	0.309524	0.300595	0.27381	0.258929	0.104167	0.0521739	0.023913	0.0108696	0.00217391	0.11	0.05	0.0333333	0.00333333	0.00333333	0

## Sheet: AbNormalRate_10_20_30
Table S12	Cancer risks from 1 to 30 years obtained from simulation under different protocols of periodic acute inammation. The periodic acute inammation score includes 0-15 and 5-15 (Fig. S18 and S19).
IS	10	15	0_15										5_15
Period	----	----	1 w	2 w	1 m	2 m	3 m	6 m	9 m	12 m	18 m	24 m	1 w	2 w	1 m	2 m	3 m	6 m
10	0.00692521	0.0169851	0.0297619	0.0505952	0.0267857	0.00892857	0.0119048	0	0.00217391	0	0	0	0.01	0.00333333	0.00666667	0	0	0
20	0.0955679	0.203822	0.199405	0.238095	0.217262	0.157738	0.116071	0.0238095	0.00869565	0.00652174	0.00217391	0	0.0466667	0.02	0.0133333	0	0.00333333	0
30	0.232687	0.450106	0.372024	0.309524	0.300595	0.27381	0.258929	0.104167	0.0521739	0.023913	0.0108696	0.00217391	0.11	0.05	0.0333333	0.00333333	0.00333333	0
